- A-97** Room E, 10/17/2000 2:00 PM - 4:00 PM (PS)  
**Sevoflurane Anesthesia Does Not Induce Sister Chromatid Exchanges in Lymphocytes of Children** Thorsten Krause, M.D.; Jens Scholz, M.D.; Lars Jansen, M.D.; Claudia Koch, M.D.; Jochen Schulte am Esch, M.D., *Anesthesiology, University-Hospital Eppendorf, Hamburg, Germany.* Degradation products of sevoflurane produce genotoxicity in vitro. This was not confirmed in vivo after sevoflurane anesthesia.
- A-98** Room E, 10/17/2000 2:00 PM - 4:00 PM (PS)  
**The Role of Nitric Oxide in Isoflurane-Mediated Vasodilation in Humans** Ali Mchaourab, MD; Thomas J. Ebert, MD, PhD, *Anesthesiology, Medical College of Wisconsin, Milwaukee, WI, United States.* Nitric oxide plays an important role in the vasodilation of vessels during isoflurane anesthesia, however whether it is active or permissive is not yet known.
- A-99** Room E, 10/17/2000 2:00 PM - 4:00 PM (PS)  
**Induction of Heme Oxygenase-1 Minimizes Venular Leukocyte-Endothelial Interaction Elicited by Halothane Anesthesia In Vivo** Hiroshi Morisaki, MD; Tomihiro Katayama, MD; Yoshitomi Kotake, MD; Junzo Takeda, MD; Makoto Suematsu, MD, *Anesthesiology, Keio University School of Medicine, Tokyo, Japan.* Induction of heme oxygenase-1 modified halothane-induced leukocyte adhesion in vivo.
- A-100** Room E, 10/17/2000 2:00 PM - 4:00 PM (PS)  
**Intraoperative Morphine and Early Recovery after Remifentanyl-Sevoflurane-N<sub>2</sub>O Anesthesia** Hernan R. Munoz, MD; Mario E. Guerrero, MD; Verena Brandes, MD, *Department of Anesthesiology, Catholic University, Santiago, Chile.* The intraoperative administration of morphine during a remifentanyl-based anesthesia did not prolong the early recovery period compared to placebo.
- A-101** Room E, 10/17/2000 2:00 PM - 4:00 PM (PS)  
**Sevoflurane-Vaporized Cardioplegia Improves Myocardial Wall Motion after Coronary Revascularization** Nader D. Nader, M.D., PhD.; Carlos M. Li, M.D.; Wiam Z. Khadra, PhD; Anthony L. Panos, M.D.; Paul R. Knight, M.D., PhD., *Anesthesiology, University of Arkansas, Little Rock, AR, United States.* Vaporizing cardioplegia solution with sevoflurane decreased wall motion abnormality after coronary revascularization.
- A-102** Room E, 10/17/2000 2:00 PM - 4:00 PM (PS)  
**Minimum Alveolar Concentration (MAC) of Xenon with Sevoflurane in Humans** Yoshinori Nakata, MD, MBA; Takahisa Goto, MD; Yoshiki Isbiguro, MD; Yoshinari Niimi, MD; Shigeo Morita, MD, *Anesthesia, Teikyo University Ichihara Hospital, Ichihara, Chiba, Japan.* The MAC values of xenon and sevoflurane are 63.1% and 1.74%, respectively.
- A-103** Room E, 10/17/2000 2:00 PM - 4:00 PM (PS)  
**Deletion in RyR1 Gene Associated with MH and with Abnormal Electrically Evoked Twitch Tension In Vitro** Thomas E. Nelson, PhD.; Nyamkhisg Sambuughin, PhD., *Dept. of Anesthesiology, Wake Forest University School of Medicine, Winston-Salem, NC, United States.* A novel 3-base deletion in the RyR1 gene links to MH susceptibility and unusual contraction phenotype in 2 affected families.
- A-104** Room E, 10/17/2000 2:00 PM - 4:00 PM (PS)  
**Verapamil and Nifedipine Differentially Modulate the Effect of Sevoflurane on Cardiac L-Type Calcium Channel** Hirotsugu Okamoto, M.D., PhD.; Anthony J. Mazzeo, M.D.; Zeljko J. Bosnjak, PhD.; Wai-Meng Kwok, PhD., *Anesthesiology, Medical College of Wisconsin, Milwaukee, WI, United States.* Verapamil and nifedipine may interact with sevoflurane at distinct sites on cardiac L-type calcium channel.
- A-105** Room E, 10/17/2000 2:00 PM - 4:00 PM (PS)  
**Effect of Halothane on IP<sub>3</sub> and Ryanodine Receptor Calcium Release Channels in Airway Smooth Muscle** Christina M. Pabellick, M.D.; Y.S. Prakash, PhD.; Gary C. Sieck, PhD., *Department of Anesthesiology, Mayo Clinic, Rochester, MN, United States.* Halothane depletes Ca<sup>2+</sup> stores in airway smooth muscle by inducing leak through IP<sub>3</sub> and ryanodine receptor channels.
- A-106** Room E, 10/17/2000 2:00 PM - 4:00 PM (PS)  
**Intravenous Isoflurane Lipid Emulsion is More of a Myocardial Depressant Than Inhaled Isoflurane** Christian Popa, MD; John L. Fontana, MD; Paul D. Mongan, MD, *Anesthesiology, Walter Reed Army Medical Center, Washington, DC, United States.* We compared the hemodynamic effects of IV and inhaled isoflurane and found similar HR and BP but greater myocardial depression using the IV route.
- A-107** Room E, 10/17/2000 2:00 PM - 4:00 PM (PS)  
**"Paradoxical Arousal" during Bispectral Index Monitoring** Ira J. Rampil, MS, MD; Hongmei Cai, PhD; Patricia B. Embree, RN; Scott D. Greenwald, PhD, *Anesthesia, University of California, San Francisco, CA, United States.* Paradoxical arousal (PA) slows EEG; we sought its prevalence. In 1901 anesthetized EEGs, we found 37 PA; 10x more frequent in vapor than iv anesthetics, 4x more common under 18 yr.
- A-108** Room E, 10/17/2000 2:00 PM - 4:00 PM (PS)  
**Optimization of Maintenance Concentrations of Volatile Anesthetics, Propofol, and Opioids: Costs and Awakening Times** Heiko Roepcke, M.D.; Thomas Bouillon, M.D.; Joergen Bruhn, M.D., *Dep. of Anesthesiology, University of Bonn, Bonn, Germany.* Pharmacokinetic and -dynamic models were used to identify optimal anesthetic drug combinations with respect to minimal costs or awakening times.
- A-109** Room E, 10/17/2000 2:00 PM - 4:00 PM (PS)  
**Hemodynamic Responses to Isoflurane, Desflurane, and Sevoflurane in Rats Following Chronic Morphine or Cocaine Administration** R. Sabar; A.D. Kaye; S. Vig; C. Riccardi; J.E. Heavner, *Anesthesiology, Physiology, Pharmacology, Texas Tech University, Lubbock, TX, United States.* SBP response in rats exposed chronically to morphine or cocaine is dependent on anesthetic and its concentration.
- A-110** Room E, 10/17/2000 2:00 PM - 4:00 PM (PS)  
**Sevoflurane Does Not Affect Platelet Function in Coronary Artery Bypass Graft** Hiroshi Sakamoto, M.D.; Takahisa Mayumi, M.D.; Osamu Kemmotsu, M.D., *Department of Anesthesia, Hokkaido OHNO Hospital, Sapporo, Hokkaido, Japan.* Sevoflurane does not affect platelet function and onset time and clot rate by Sonoclot® compared with propofol in coronary artery bypass graft.
